# Supplementary material for: Dynamic clustering of genomics cohorts beyond race, ethnicity—and ancestry
Source: Springer Nature journal article supplement (doi:10.1186/s12920-025-02154-z), 2025-05-15
Supplement: MOESM10 [file 12920_2025_2154_MOESM10_ESM.pdf]

# LIHC-HFI-C1

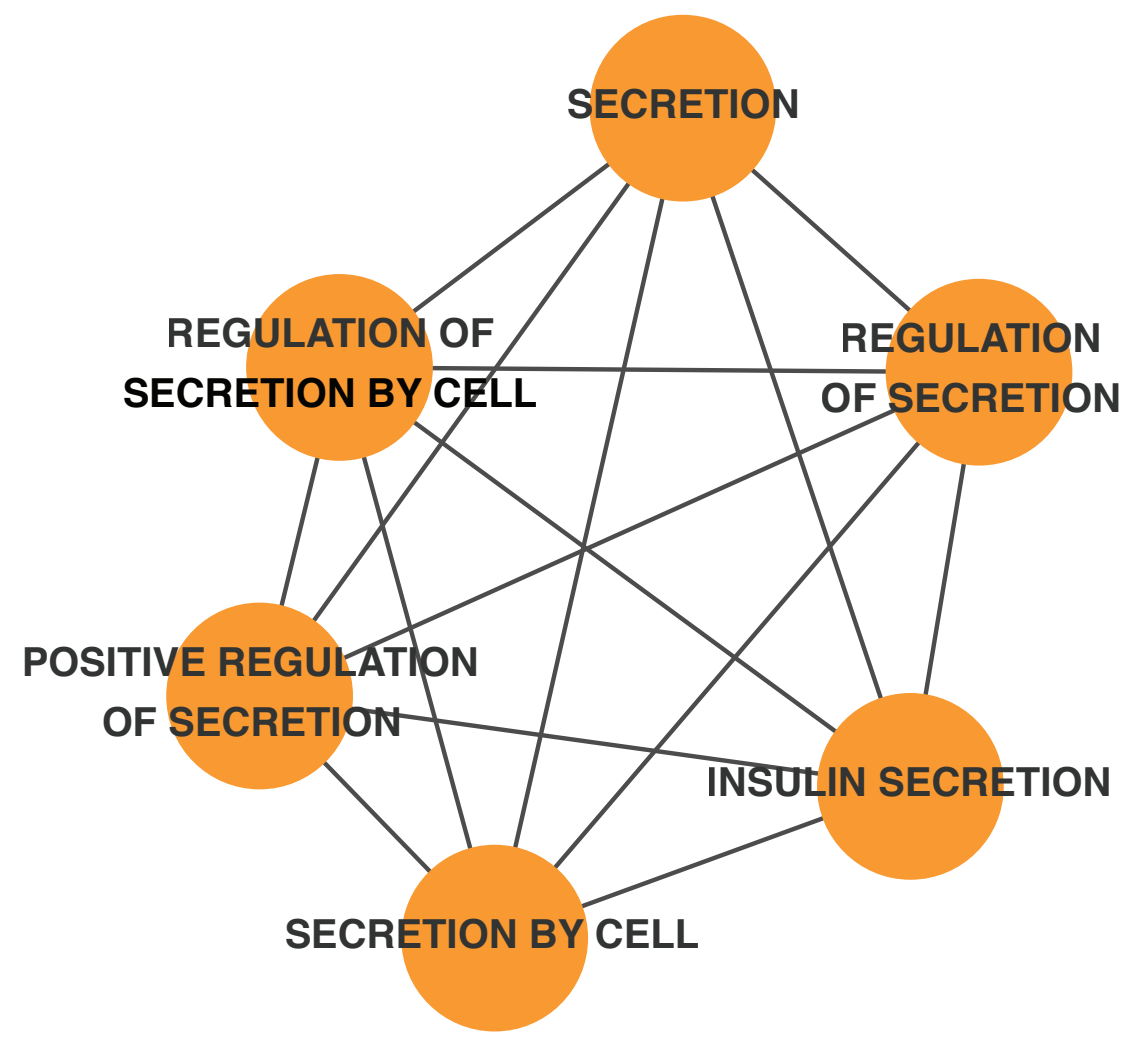

# LUSC-COSMIC-C2

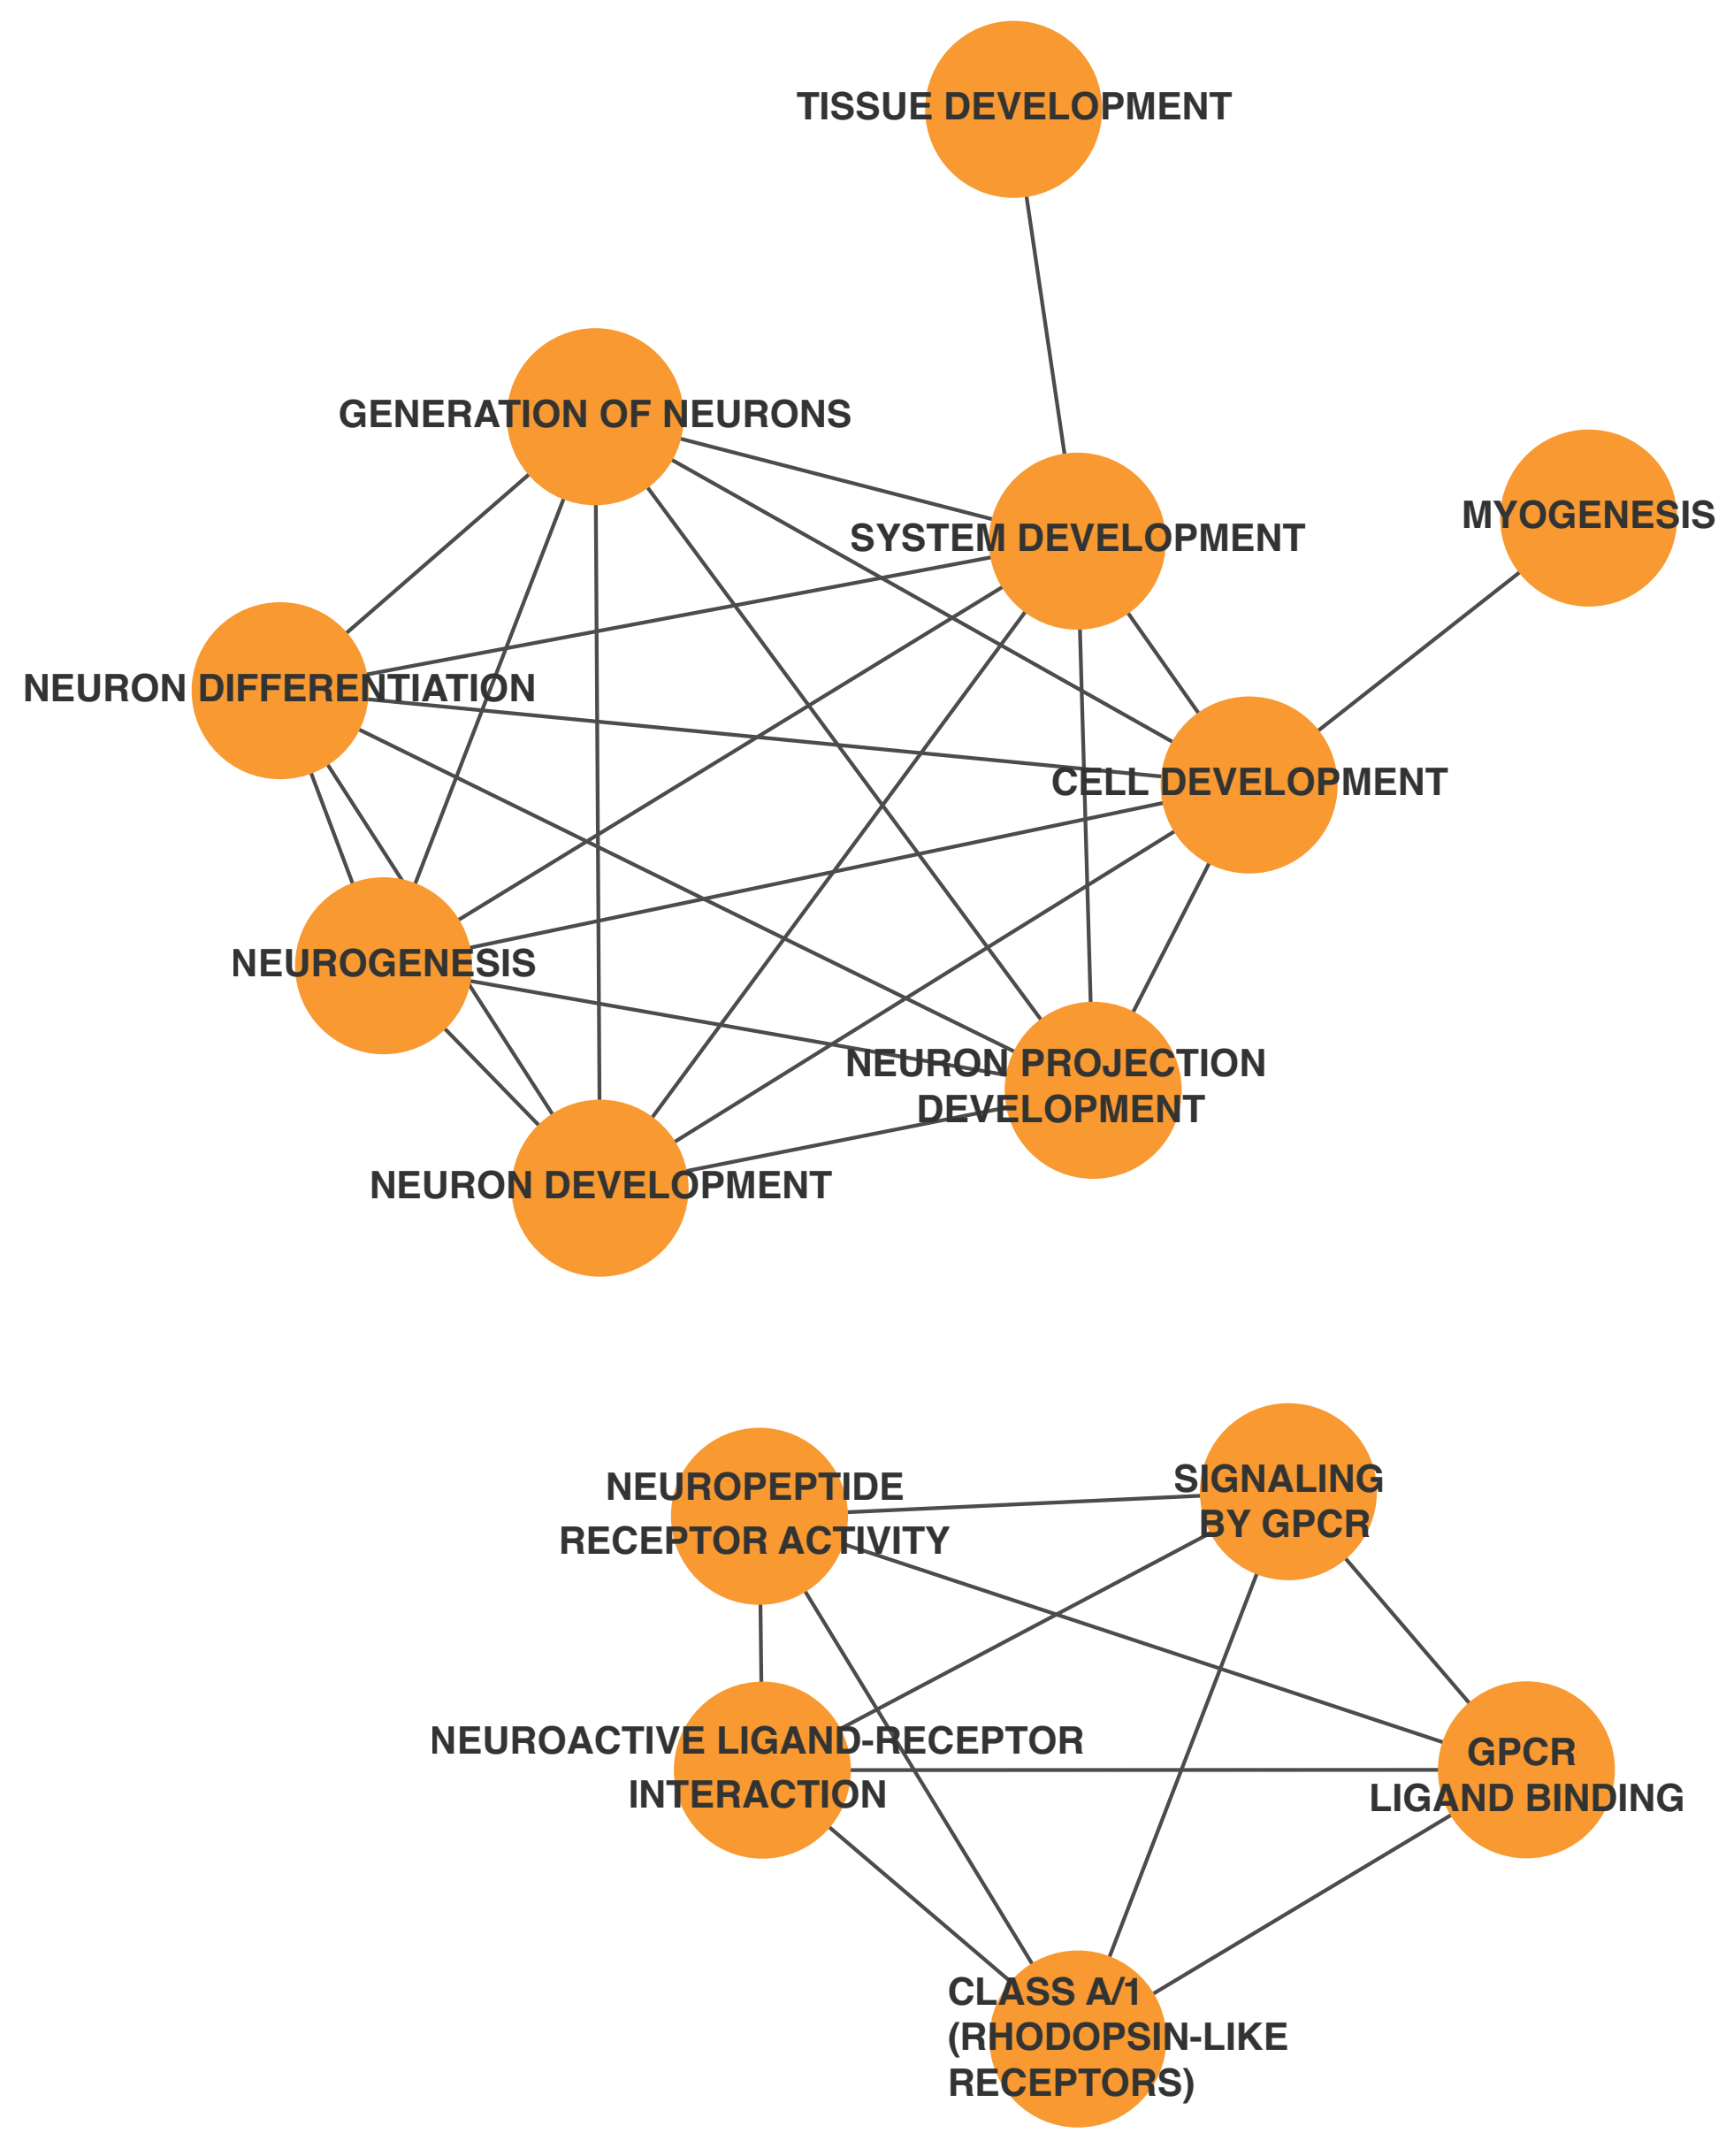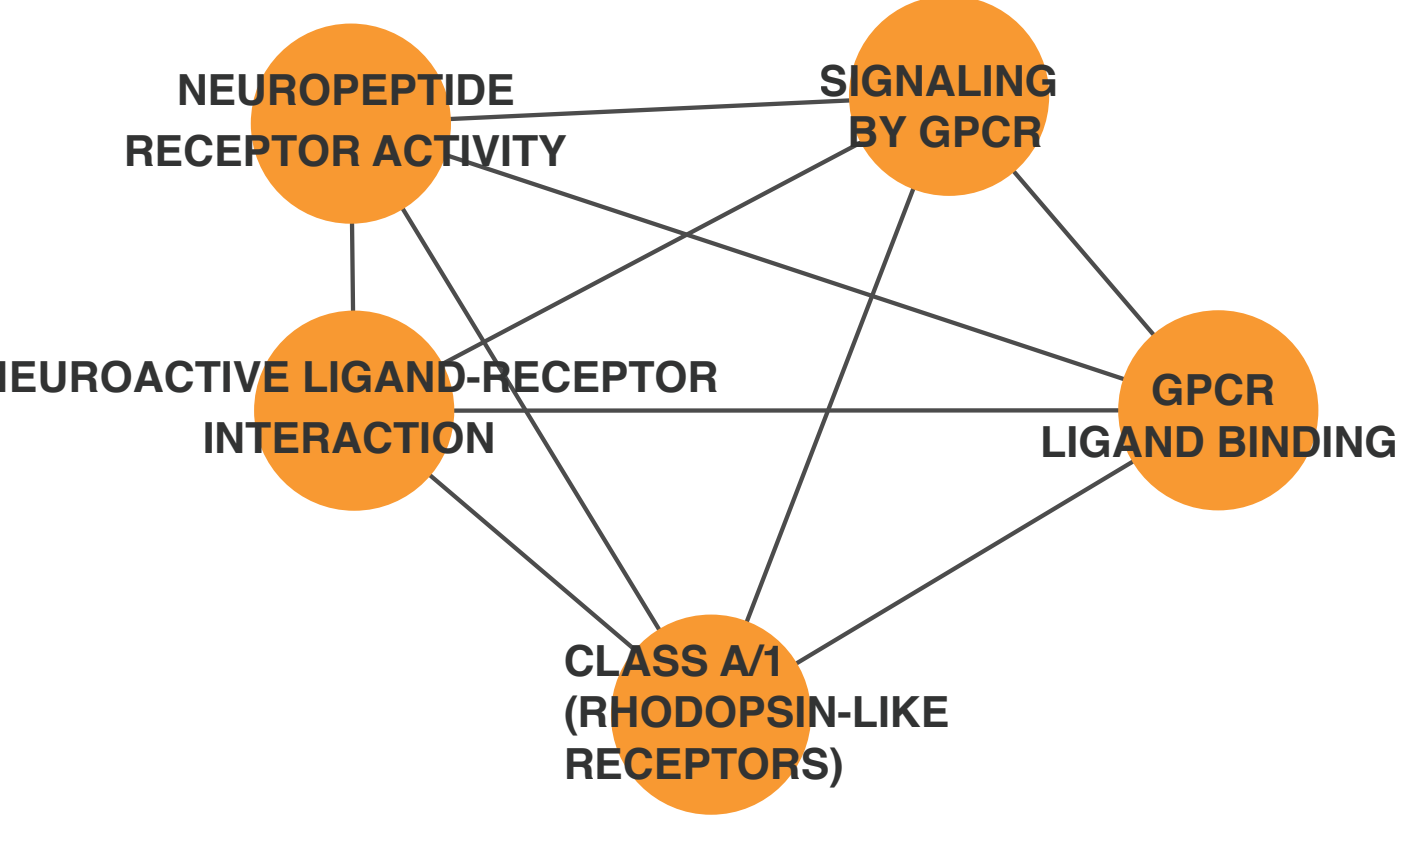

# READ-HFI-C2

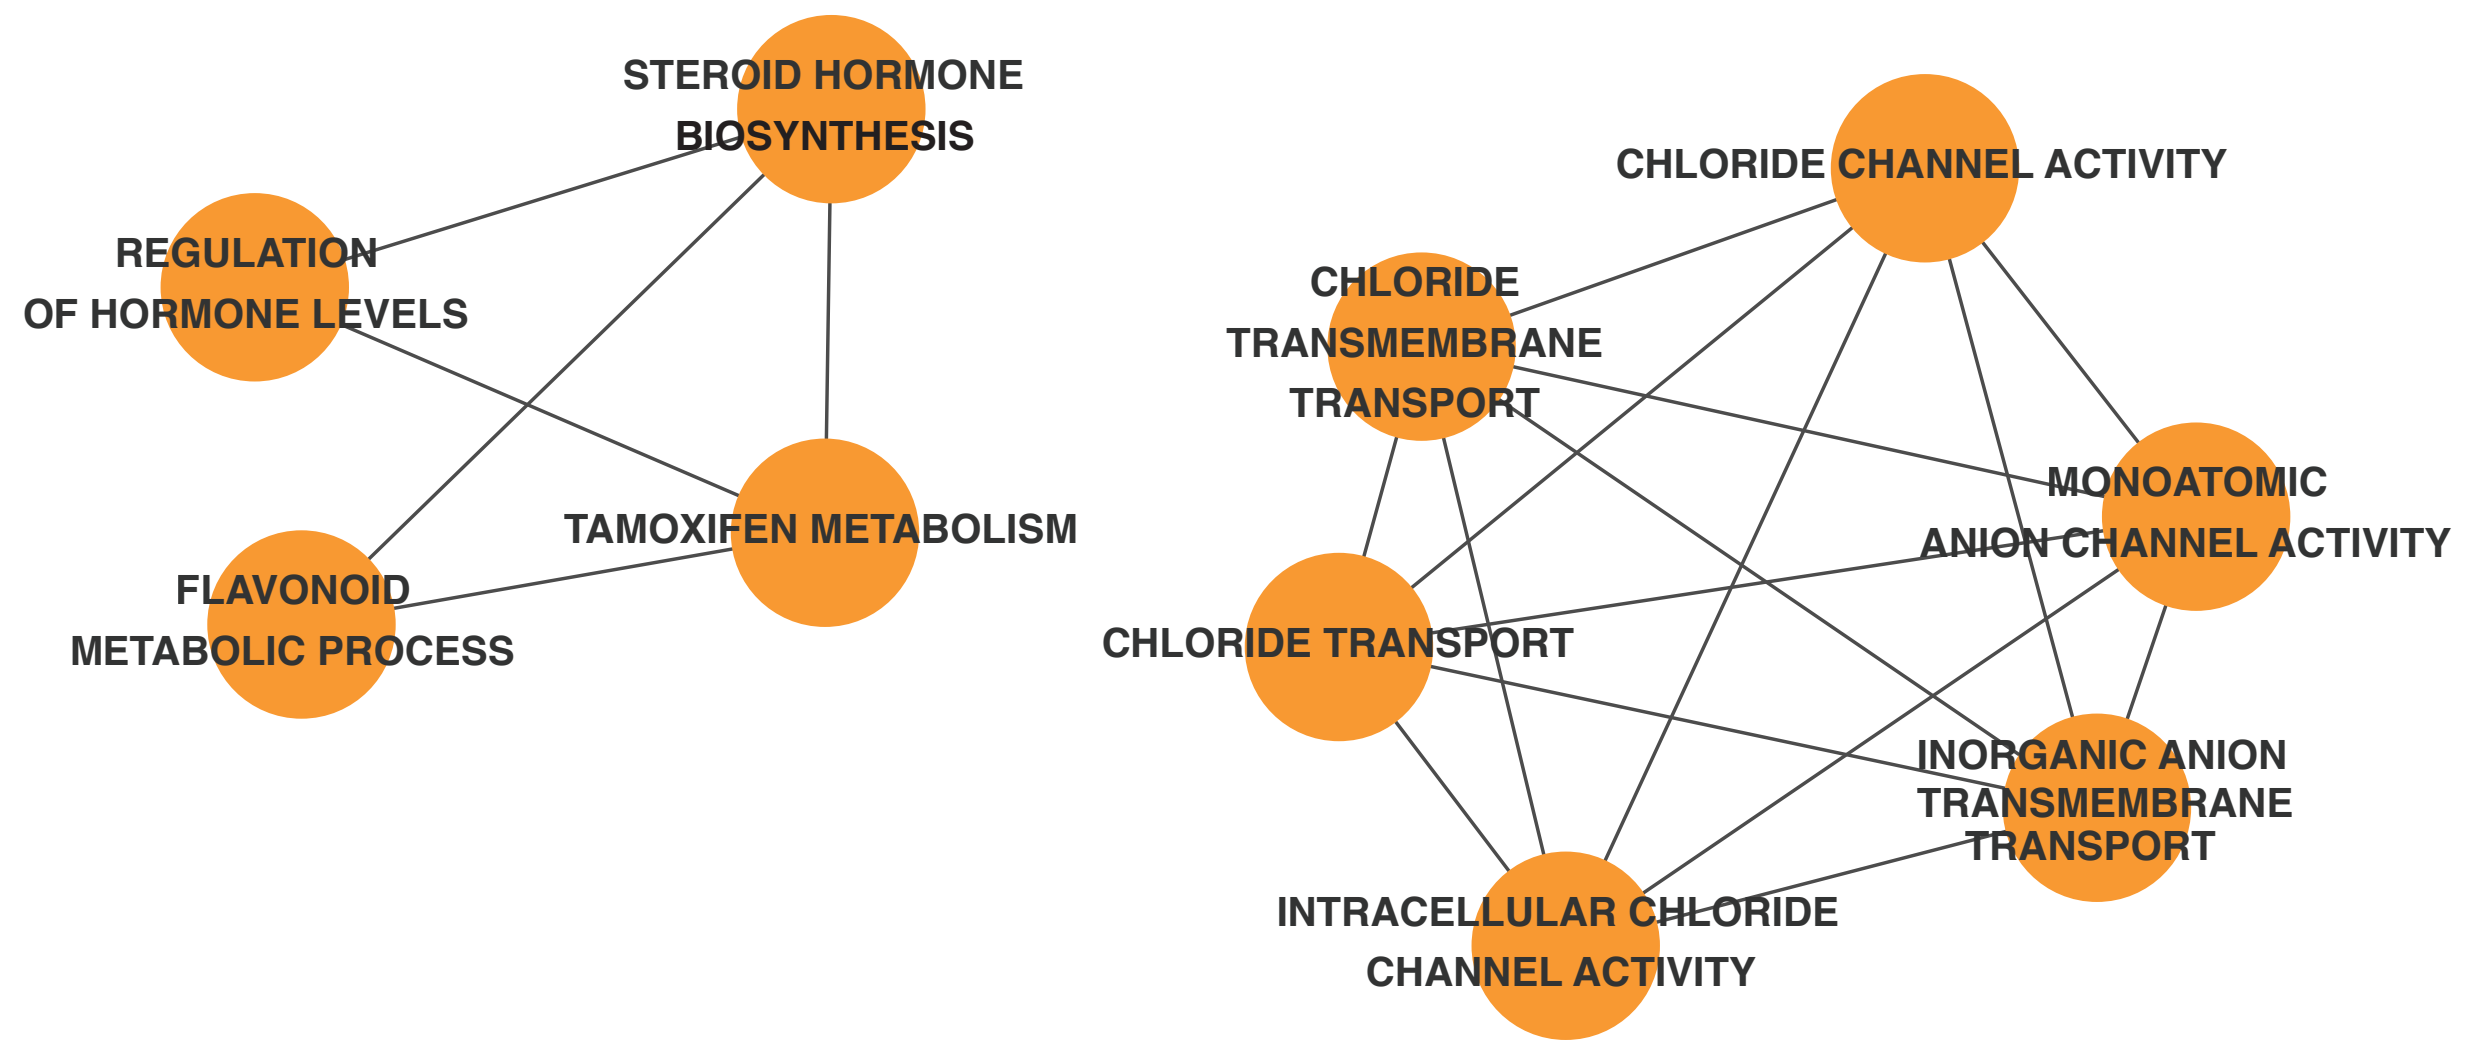

Supplementary Figure 10. Non-cancer signifiers significantly associated with single dynamic clusters in LIHC-HFI-C1, LUSC-COSMIC-C2, and READ-HFI-C2
